# Supplementary material for: Split Histidine Kinases Enable Ultrasensitivity and Bistability in Two-Component Signaling Networks
Source: PubMed Central journal article supplement (PMC3591291; doi:10.1371/journal.pcbi.1002949), 2013-03-07
Supplement: pcbi.1002949.s009.pdf [file pcbi.1002949.s009.pdf]

**Table S1**

| Parameter | Description                                                                    | Value | Unit                  |
|-----------|--------------------------------------------------------------------------------|-------|-----------------------|
| $k_9$     | Association of phosphatase (CheA3) assisted dephosphorylation complex          | 5.6   | $(\mu\text{Ms})^{-1}$ |
| $k_{12}$  | Association of phosphatase (CheA3CheA4) assisted dephosphorylation complex     | 5.6   | $(\mu\text{Ms})^{-1}$ |
| $k_{15}$  | Association of phosphatase (CheA3CheA4ATP) assisted dephosphorylation complex  | 5.6   | $(\mu\text{Ms})^{-1}$ |
| $k_{18}$  | Association of phosphatase (CheA3-P) assisted dephosphorylation complex        | 5.6   | $(\mu\text{Ms})^{-1}$ |
| $k_{10}$  | Dissociation of phosphatase (CheA3) assisted dephosphorylation complex         | 0.04  | $\text{s}^{-1}$       |
| $k_{13}$  | Dissociation of phosphatase assisted (CheA3CheA4) dephosphorylation complex    | 0.04  | $\text{s}^{-1}$       |
| $k_{16}$  | Dissociation of phosphatase (CheA3CheA4ATP) assisted dephosphorylation complex | 0.04  | $\text{s}^{-1}$       |
| $k_{19}$  | Dissociation of phosphatase (CheA3-P) assisted dephosphorylation complex       | 0.04  | $\text{s}^{-1}$       |
| $k_{11}$  | $K_{\text{cat}}$ for phosphatase (CheA3) assisted dephosphorylation            | 2.5   | $\text{s}^{-1}$       |
| $k_{14}$  | $K_{\text{cat}}$ for phosphatase (CheA3CheA4) assisted dephosphorylation       | 2.5   | $\text{s}^{-1}$       |
| $k_{17}$  | $K_{\text{cat}}$ for phosphatase (CheA3CheA4ATP) assisted dephosphorylation    | 2.5   | $\text{s}^{-1}$       |
| $k_{20}$  | $K_{\text{cat}}$ for phosphatase (CheA3-P) assisted dephosphorylation          | 2.5   | $\text{s}^{-1}$       |
