# Supplementary material for: Split Histidine Kinases Enable Ultrasensitivity and Bistability in Two-Component Signaling Networks
Source: PubMed Central journal article supplement (PMC3591291; doi:10.1371/journal.pcbi.1002949), 2013-03-07
Supplement: pcbi.1002949.s010.pdf [file pcbi.1002949.s010.pdf]

**Table S2**

| Parameter | Description                                            | Value   | Unit                             |
|-----------|--------------------------------------------------------|---------|----------------------------------|
| $k_1$     | On rate for binding of CheA3 and CheA4                 | 100     | ( $\mu\text{Ms}^{-1}$ )          |
| $k'_1$    | On rate for binding of CheA3-P and CheA4               | 100     | ( $\mu\text{Ms}^{-1}$ )          |
| $k_2$     | Off rate for binding of CheA3 and CheA4                | 10      | $\text{s}^{-1}$                  |
| $k'_2$    | Off rate for binding of CheA3-P and CheA4              | 10      | $\text{s}^{-1}$                  |
| $k_5$     | $K_{\text{cat}}$ for phosphorylation of CheA3 by CheA4 | varied  | $\text{s}^{-1}$                  |
| $k'_5$    | $K_{\text{cat}}$ for phosphorylation of CheA3 by CheA4 | varied  | $\text{s}^{-1}$                  |
| $k'_6$    | CheA4/CheA3-P to CheY6 Phosphotransfer                 | 0.775   | ( $\mu\text{Ms}$ ) <sup>-1</sup> |
| $k''_6$   | CheA4/CheA3-P to CheY6 Phosphotransfer                 | 0.775   | ( $\mu\text{Ms}$ ) <sup>-1</sup> |
| $k_7$     | CheA3-P to CheY6 Reverse phosphotransfer               | 0.00283 | ( $\mu\text{Ms}$ ) <sup>-1</sup> |
| $k'_7$    | CheA4/CheA3-P to CheY6 Reverse phosphotransfer         | 0.00283 | ( $\mu\text{Ms}$ ) <sup>-1</sup> |
| $k''_7$   | CheA4/CheA3-P to CheY6 Reverse phosphotransfer         | 0.00283 | ( $\mu\text{Ms}$ ) <sup>-1</sup> |
