# Supplementary material for: Split Histidine Kinases Enable Ultrasensitivity and Bistability in Two-Component Signaling Networks
Source: PubMed Central journal article supplement (PMC3591291; doi:10.1371/journal.pcbi.1002949), 2013-03-07
Supplement: pcbi.1002949.s011.pdf [file pcbi.1002949.s011.pdf]

**Table S3**

| Parameter | Description                                            | Value   | Unit                  |
|-----------|--------------------------------------------------------|---------|-----------------------|
| $k_3$     | Forward rate for phosphorylation complex               | 1       | $(\mu\text{Ms})^{-1}$ |
| $k_4$     | Reverse rate for phosphorylation complex               | 39      | $\text{s}^{-1}$       |
| $k^*_3$   | Forward rate for phosphorylation complex with CheA2    | 1       | $(\mu\text{Ms})^{-1}$ |
| $k^*_4$   | Reverse rate for phosphorylation complex with CheA2    | 39      | $\text{s}^{-1}$       |
| $k_5$     | $K_{\text{cat}}$ for phosphorylation of CheA3 by CheA4 | varied  | $\text{s}^{-1}$       |
| $k^*_5$   | $K_{\text{cat}}$ for phosphorylation of CheA2          | varied  | $\text{s}^{-1}$       |
| $k^*_6$   | CheA2-P to CheY6 Phosphotransfer                       | 0.775   | $(\mu\text{Ms})^{-1}$ |
| $k^*_7$   | CheA2-P to CheY6 Reverse phosphotransfer               | 0.00283 | $(\mu\text{Ms})^{-1}$ |
