# Supplementary material for: Split Histidine Kinases Enable Ultrasensitivity and Bistability in Two-Component Signaling Networks
Source: PubMed Central journal article supplement (PMC3591291; doi:10.1371/journal.pcbi.1002949), 2013-03-07
Supplement: pcbi.1002949.s012.pdf [file pcbi.1002949.s012.pdf]

**Table S4**

| Parameter                  | Description                                                    | Value      | Unit                    |
|----------------------------|----------------------------------------------------------------|------------|-------------------------|
| $k_1$                      | On rate for binding of CheA3 and CheA4                         | 100        | ( $\mu\text{Ms}^{-1}$ ) |
| $k_2$                      | Off rate for binding of CheA3 and CheA4                        | 10         | $\text{s}^{-1}$         |
| $k'_1$                     | On rate for binding of CheA3P1 and CheA4                       | 100        | ( $\mu\text{Ms}^{-1}$ ) |
| $k''_1$                    | On rate for binding of CheA3P1-P and CheA4                     | 100        | ( $\mu\text{Ms}^{-1}$ ) |
| $k'_2$                     | Off rate for binding of CheA3-P1 and CheA4                     | 10         | $\text{s}^{-1}$         |
| $k''_2$                    | Off rate for binding of CheA3P1-P and CheA4                    | 10         | $\text{s}^{-1}$         |
| $k_6$                      | CheA3-P to CheY6 Phosphotransfer                               | 0.775      | ( $\mu\text{Ms}^{-1}$ ) |
| $k_7$                      | CheA3-P to CheY6 Reverse phosphotransfer                       | 0.00283    | ( $\mu\text{Ms}^{-1}$ ) |
| $k'_6$                     | CheA4/CheA3P1-P to CheY6 Phosphotransfer                       | 0.775      | ( $\mu\text{Ms}^{-1}$ ) |
| $k'_7$                     | CheA4/CheA3P1-P to CheY6 Reverse phosphotransfer               | 0.00283    | ( $\mu\text{Ms}^{-1}$ ) |
| $k_8$                      | Autodephosphorylation of CheY6-P                               | 0.169      | $\text{s}^{-1}$         |
| $k_9$                      | Association of phosphatase assisted dephosphorylation complex  | 5.6        | ( $\mu\text{Ms}^{-1}$ ) |
| $k_{10}$                   | Dissociation of phosphatase assisted dephosphorylation complex | 0.04       | $\text{s}^{-1}$         |
| $k_{11}$                   | $k_{cat}$ for phosphatase assisted dephosphorylation           | 2.5        | $\text{s}^{-1}$         |
| $[\text{A3}]_{\text{tot}}$ | Total concentration of CheA3                                   | 2.5        | $\mu\text{M}$           |
| $[\text{A4}]_{\text{tot}}$ | Total concentration of CheA4                                   | 0,20,40,60 | $\mu\text{M}$           |
| $[\text{Y6}]_{\text{tot}}$ | Total concentration of CheY6                                   | 100        | $\mu\text{M}$           |
| $[\text{A3P1-P}]$          | Total concentration of CheA3P1-P                               | 30         | $\mu\text{M}$           |
